# Supplementary material
Source: publisher figshare collection journal article supplement (https://frontiersin.figshare.com/ndownloader/files/35501624)

Electronic Supplementary Material

**Testing the role of environmental harshness and sexual selection in limb muscles mass in anurans**

Yue Jun Yang1,2#, Ying Jiang1,2#, Zhi Ping Mi1,2, Wen Bo Liao1,2*

1Key Laboratory of Southwest China Wildlife Resources Conservation (Ministry of Education), China West Normal University, Nanchong 637009, Sichuan, China

2Key Laboratory of Artificial Propagation and Utilization in Anurans of Nanchong City, China West Normal University, Nanchong, 637009, Sichuan, China

#Equal contribution.

*Corresponding author, E-mail: [Liaobo_0_0@126.com](mailto:Liaobo_0_0@126.com).

Table S1 Data on sample size, male-biased operational sex ratio (OSR), coefficient of variation of temperature and rainfall (CV in temperature and rainfall) in anuran species for each sex (M = male, F = female).

| Species | Sample size | | OSR | CV in temperature | CV in rainfall |
| --- | --- | --- | --- | --- | --- |
| M | F |
| *Amolops chunganensis* | 4 | 2 | 1.22 | 0.73 | 0.69 |
| *Amolops loloensis* | 3 | 2 | 1.50 | 0.39 | 0.75 |
| *Amolops mantzorum* | 4 | 4 | 1.24 | 0.44 | 0.63 |
| *Amolops ricketti* | 3 | 2 | 0.85 | 0.45 | 0.45 |
| *Amolops sinensis* | 4 | 2 | 0.99 | 0.49 | 0.48 |
| *Amolops torrentis* | 2 | 2 | 1.19 | 0.14 | 0.90 |
| *Aquixalus palpebralis* | 4 | 1 | 1.28 | 0.32 | 0.85 |
| *Bombina maxima* | 4 | 2 | 1.24 | 0.55 | 0.99 |
| *Bufo andrewsi* | 4 | 4 | 1.24 | 0.44 | 0.63 |
| *Bufo gargarizans* | 4 | 4 | 1.44 | 0.39 | 0.64 |
| *Bufo melanostictus* | 4 | 4 | 1.26 | 0.35 | 0.47 |
| *Bufo minshanicus* | 4 | 4 | 1.01 | 2.71 | 0.55 |
| *Bufo tibetanus* | 4 | 2 | 1.15 | 0.67 | 0.81 |
| *Calluella yunnanensis* | 3 | 2 | 0.88 | 0.29 | 0.89 |
| *Chirixalus doriae* | 4 | 2 | 0.82 | 0.14 | 0.92 |
| *Chirixalus vittatus* | 4 | 1 | 1.15 | 0.14 | 0.90 |
| *Feirana quadranus* | 4 | 4 | 1.81 | 0.64 | 0.64 |
| *Fejervarya limnocharis* | 4 | 4 | 1.10 | 0.37 | 0.40 |
| *Hyla annectans wulingensis* | 4 | 2 | 1.20 | 0.44 | 0.38 |
| *Hyla tsinlingensis* | 4 | 1 | 1.26 | 0.59 | 0.59 |
| *Hylarana guentheri* | 4 | 4 | 1.12 | 0.40 | 0.70 |
| *Kaloula pulchra* | 2 | 2 | 1.06 | 0.11 | 0.93 |
| *Kaloula rugifera* | 4 | 2 | 0.65 | 0.42 | 0.70 |
| *Kaloula verrucosa* | 4 | 2 | 1.24 | 0.34 | 0.80 |
| *Leptobrachella feii* | 4 | 2 | 1.54 | 0.21 | 0.85 |
| *Leptobrachium boringii* | 4 | 2 | 1.12 | 0.53 | 0.85 |
| *Leptolalax oshanensis* | 4 | 2 | 0.85 | 0.15 | 1.03 |
| *Leptolalax vencruiseunctatus* | 4 | 2 | 0.88 | 0.11 | 0.93 |
| *Limnonectes fujianensis* | 4 | 2 | 0.88 | 0.59 | 0.59 |
| *Lithobates catesbeinaus* | 2 | 2 | 1.14 | 0.40 | 0.70 |
| *Megophrys spinata* | 4 | 2 | 1.10 | 0.52 | 0.45 |
| *Microhyla butleri* | 4 | 2 | 1.22 | 0.35 | 0.47 |
| *Microhyla heymonsi* | 4 | 2 | 1.05 | 0.47 | 0.42 |
| *Microhyla ornata* | 4 | 4 | 0.98 | 0.39 | 0.64 |
| *Microhyla pulchra* | 2 | 2 | 1.24 | 0.35 | 0.47 |
| *Nanorana pleskei* | 4 | 2 | 0.98 | 2.13 | 0.51 |
| *Nidirana yeae* | 4 | 2 | 1.12 | 0.49 | 0.48 |
| *Occidozyga martensii* | 4 | 2 | 1.42 | 0.15 | 1.03 |
| *Odorrana grahami* | 4 | 2 | 1.27 | 0.34 | 0.80 |
| *Odorrana graminea* | 4 | 4 | 1.75 | 0.14 | 0.90 |
| *Odorrana hejiangensis* | 4 | 2 | 1.52 | 0.52 | 0.48 |
| *Odorrana lungshengensis* | 3 | 2 | 0.88 | 0.45 | 0.45 |
| *Odorrana margaretae* | 4 | 2 | 1.26 | 0.44 | 0.46 |
| *Odorrana nasuta* | 4 | 2 | 1.25 | 0.38 | 0.56 |
| *Odorrana schmackeri* | 4 | 2 | 1.66 | 0.32 | 0.85 |
| *Odorrana tiannanensis* | 2 | 2 | 0.98 | 0.14 | 0.90 |
| *Oreolalax rugosus* | 2 | 2 | 1.17 | 0.54 | 0.75 |
| *Paa boulengeri* | 4 | 2 | 0.76 | 0.49 | 0.69 |
| *Paa yunnanensis* | 4 | 2 | 0.94 | 0.34 | 0.80 |
| *Pelophylax hubeiensis* | 4 | 2 | 1.49 | 0.39 | 0.51 |
| *Pelophylax nigromaculatus* | 4 | 4 | 1.36 | 0.39 | 0.64 |
| *Pelophylax pleuraden* | 4 | 4 | 1.24 | 0.34 | 0.80 |
| *Polypedates megacephalus* | 4 | 2 | 1.40 | 0.43 | 0.51 |
| *Polypedates mutus* | 4 | 2 | 1.40 | 0.35 | 0.47 |
| *Pseudorana weiningensis* | 4 | 2 | 0.60 | 0.45 | 0.45 |
| *Rana chaochiaoensis* | 4 | 2 | 1.34 | 0.35 | 0.83 |
| *Rana chensinensis* | 4 | 4 | 1.33 | 0.50 | 0.57 |
| *Rana hanluica* | 6 | 2 | 0.88 | 0.54 | 0.45 |
| *Rana kukunoris* | 4 | 4 | 1.10 | 1.26 | 0.55 |
| *Rana omeimontis* | 4 | 2 | 1.19 | 0.49 | 0.69 |
| *Rhacophorus dugritei* | 4 | 2 | 1.40 | 0.53 | 0.69 |
| *Rhacophorus omeimontis* | 4 | 2 | 1.35 | 0.44 | 0.63 |
| *Scutiger chintingensis* | 2 | 2 | 1.20 | 0.48 | 0.69 |
| *Scutiger glandulatus* | 2 | 2 | 1.14 | 1.67 | 0.67 |

Table S2 Data on snout-vent length (SVL), forelimb muscle (g), hindlimb muscle (g), limb muscle (g) of voucher specimens in anuran species

| Species | No | Sex | SVL | Forelimb | Hindlimb | Total limb |
| --- | --- | --- | --- | --- | --- | --- |
| *Amolops chunganensis* | 2020061502 | male | 34.5 | 0.0709 | 0.3636 | 0.4345 |
| *Amolops chunganensis* | 2020061503 | male | 35 | 0.0956 | 0.6272 | 0.7228 |
| *Amolops chunganensis* | 2020061505 | male | 37.5 | 0.0686 | 0.5805 | 0.6491 |
| *Amolops chunganensis* | 2020061506 | male | 35.55 | 0.0741 | 0.5307 | 0.6048 |
| *Amolops loloensis* | 2020071401 | male | 57.2 | 1.2826 | 5.1368 | 6.4194 |
| *Amolops loloensis* | 2020071402 | male | 51.9 | 0.9701 | 5.0138 | 5.9839 |
| *Amolops loloensis* | 2020071405 | male | 48.1 | 1.0131 | 5.8271 | 6.8402 |
| *Amolops mantzorum* | 2018051401 | male | 44.21 | 0.4102 | 2.6557 | 3.0659 |
| *Amolops mantzorum* | 2018051402 | male | 51 | 0.8396 | 2.1215 | 2.9611 |
| *Amolops mantzorum* | 2018051404 | male | 59.96 | 0.8793 | 2.5478 | 3.4271 |
| *Amolops mantzorum* | 2018051405 | male | 59.89 | 0.6921 | 2.8175 | 3.5096 |
| *Amolops ricketti* | 2020060701 | male | 50.82 | 0.2706 | 2.4476 | 2.7182 |
| *Amolops ricketti* | 2020060702 | male | 51.58 | 0.2432 | 2.4678 | 2.711 |
| *Amolops ricketti* | 2020060704 | male | 53 | 0.3961 | 2.6074 | 3.0035 |
| *Amolops sinensis* | 2019061102 | male | 50.24 | 0.3886 | 3.2996 | 3.6882 |
| *Amolops sinensis* | 2019061103 | male | 51.32 | 0.2937 | 2.9331 | 3.2268 |
| *Amolops sinensis* | 2019061104 | male | 49.27 | 0.2548 | 2.7412 | 2.996 |
| *Amolops sinensis* | 2019061105 | male | 59.57 | 0.3356 | 2.9693 | 3.3049 |
| *Amolops torrentis* | 2019071401 | male | 48.9 | 0.1288 | 1.2346 | 1.3634 |
| *Amolops torrentis* | 2019071403 | male | 58.1 | 0.1584 | 1.9644 | 2.1228 |
| *Aquixalus palpebralis* | 2020061502 | male | 27.3 | 0.0196 | 0.0999 | 0.1195 |
| *Aquixalus palpebralis* | 2020061504 | male | 27.14 | 0.0183 | 0.121 | 0.1393 |
| *Aquixalus palpebralis* | 2020061505 | male | 26.9 | 0.0206 | 0.146 | 0.1666 |
| *Aquixalus palpebralis* | 2020061506 | male | 26.98 | 0.0163 | 0.1223 | 0.1386 |
| *Bombina maxima* | 2013041001 | male | 57.25 | 0.385 | 1.2912 | 1.6762 |
| *Bombina maxima* | 2013041002 | male | 56.89 | 0.4448 | 1.2688 | 1.7136 |
| *Bombina maxima* | 2013041003 | male | 56.22 | 0.4993 | 1.443 | 1.9423 |
| *Bombina maxima* | 2013041004 | male | 62.04 | 0.5225 | 2.087 | 2.6095 |
| *Bufo andrewsi* | 2019041405 | male | 70.18 | 1.9616 | 7.6783 | 9.6399 |
| *Bufo andrewsi* | 2019041406 | male | 73.46 | 1.3558 | 10.0559 | 11.4117 |
| *Bufo andrewsi* | 2019041407 | male | 78.86 | 1.0687 | 9.7548 | 10.8235 |
| *Bufo andrewsi* | 2019041408 | male | 76.3 | 0.7575 | 9.0362 | 9.7937 |
| *Bufo gargarizans* | 2018031205 | male | 101.18 | 4.7353 | 30.3157 | 35.051 |
| *Bufo gargarizans* | 2018031206 | male | 96.98 | 4.901 | 16.176 | 21.077 |
| *Bufo gargarizans* | 2018031207 | male | 98.18 | 4.7433 | 25.7829 | 30.5262 |
| *Bufo gargarizans* | 2018031208 | male | 101.66 | 3.8389 | 29.459 | 33.2979 |
| *Bufo melanostictus* | 2018050211 | male | 61.55 | 0.7219 | 1.141 | 1.8629 |
| *Bufo melanostictus* | 2018050213 | male | 63.71 | 0.6255 | 1.329 | 1.9545 |
| *Bufo melanostictus* | 2018050214 | male | 68.3 | 0.6371 | 1.023 | 1.6601 |
| *Bufo melanostictus* | 2018050215 | male | 64.17 | 0.6775 | 0.943 | 1.6205 |
| *Bufo minshanicus* | 2020071305 | male | 70.42 | 2.2892 | 4.7287 | 7.0179 |
| *Bufo minshanicus* | 2020071306 | male | 65.56 | 2.1551 | 4.0374 | 6.1925 |
| *Bufo minshanicus* | 2020071307 | male | 61.38 | 2.1138 | 3.6999 | 5.8137 |
| *Bufo minshanicus* | 2020071308 | male | 72.64 | 2.2547 | 4.4868 | 6.7415 |
| *Bufo tibetanus* | 2019070101 | male | 72.67 | 1.1283 | 2.9121 | 4.0404 |
| *Bufo tibetanus* | 2019070102 | male | 64.33 | 0.7016 | 2.1775 | 2.8791 |
| *Bufo tibetanus* | 2019070103 | male | 56.22 | 0.7606 | 2.5516 | 3.3122 |
| *Bufo tibetanus* | 2019070105 | male | 66.38 | 1.1247 | 2.4168 | 3.5415 |
| *Calluella yunnanensis* | 2020071101 | male | 32.8 | 0.0335 | 0.4154 | 0.4489 |
| *Calluella yunnanensis* | 2020071103 | male | 32.4 | 0.0611 | 0.3197 | 0.3808 |
| *Calluella yunnanensis* | 2020071104 | male | 29.9 | 0.0278 | 0.389 | 0.4168 |
| *Chirixalus doriae* | 2020070701 | male | 24.2 | 0.0146 | 0.0892 | 0.1038 |
| *Chirixalus doriae* | 2020070702 | male | 24.1 | 0.0127 | 0.1093 | 0.122 |
| *Chirixalus doriae* | 2020070704 | male | 25.5 | 0.0133 | 0.1042 | 0.1175 |
| *Chirixalus doriae* | 2020070705 | male | 30.6 | 0.0174 | 0.10089 | 0.11829 |
| *Chirixalus vittatus* | 2020071401 | male | 24.14 | 0.0038 | 0.0394 | 0.0432 |
| *Chirixalus vittatus* | 2020071402 | male | 21.45 | 0.0041 | 0.0466 | 0.0507 |
| *Chirixalus vittatus* | 2020071403 | male | 27.54 | 0.0075 | 0.0586 | 0.0661 |
| *Chirixalus vittatus* | 2020071404 | male | 23.27 | 0.0078 | 0.0674 | 0.0752 |
| *Feirana quadranus* | 2018050101 | male | 87.5 | 1.3469 | 10.2308 | 11.5777 |
| *Feirana quadranus* | 2018050102 | male | 69.72 | 1.4244 | 8.2233 | 9.6477 |
| *Feirana quadranus* | 2018050103 | male | 62.13 | 1.2372 | 8.1687 | 9.4059 |
| *Feirana quadranus* | 2018050104 | male | 55.09 | 0.8961 | 7.6184 | 8.5145 |
| *Fejervarya multistriata* | 2019040205 | male | 41.66 | 0.2603 | 0.6709 | 0.9312 |
| *Fejervarya multistriata* | 2019040207 | male | 39.32 | 0.1743 | 0.4339 | 0.6082 |
| *Fejervarya multistriata* | 2019040208 | male | 36.17 | 0.1181 | 0.5284 | 0.6465 |
| *Fejervarya multistriata* | 2019040209 | male | 32.85 | 0.0977 | 0.54 | 0.6377 |
| *Hyla annectans wulingensis* | 2020050401 | male | 34.66 | 0.0595 | 0.1436 | 0.2031 |
| *Hyla annectans wulingensis* | 2020050402 | male | 34.14 | 0.0371 | 0.1446 | 0.1817 |
| *Hyla annectans wulingensis* | 2020050403 | male | 34.09 | 0.0119 | 0.1316 | 0.1435 |
| *Hyla annectans wulingensis* | 2020050405 | male | 32.71 | 0.0169 | 0.0874 | 0.1043 |
| *Hyla tsinlingensis* | 2018050701 | male | 34.73 | 0.0388 | 0.2075 | 0.2463 |
| *Hyla tsinlingensis* | 2018050702 | male | 35.56 | 0.0401 | 0.2969 | 0.337 |
| *Hyla tsinlingensis* | 2018050703 | male | 33.02 | 0.0397 | 0.1375 | 0.1772 |
| *Hyla tsinlingensis* | 2018050706 | male | 43.49 | 0.0458 | 0.1237 | 0.1695 |
| *Hylarana guentheri* | 2018041205 | male | 55.93 | 0.3313 | 4.1638 | 4.4951 |
| *Hylarana guentheri* | 2018041206 | male | 61.18 | 0.5622 | 4.3429 | 4.9051 |
| *Hylarana guentheri* | 2018041207 | male | 58.26 | 0.4576 | 4.3744 | 4.832 |
| *Hylarana guentheri* | 2018041208 | male | 59.83 | 0.4845 | 5.0113 | 5.4958 |
| *Kaloula pulchra* | 2020070101 | male | 70.2 | 0.3821 | 2.6423 | 3.0244 |
| *Kaloula pulchra* | 2020070102 | male | 78.98 | 0.6015 | 2.7123 | 3.3138 |
| *Kaloula rugifera* | 2018050401 | male | 38.92 | 0.187 | 0.532 | 0.719 |
| *Kaloula rugifera* | 2018050402 | male | 38.94 | 0.184 | 0.6302 | 0.8142 |
| *Kaloula rugifera* | 2018050403 | male | 36.49 | 0.1876 | 0.6018 | 0.7894 |
| *Kaloula rugifera* | 2018050404 | male | 41.25 | 0.2018 | 0.556 | 0.7578 |
| *Kaloula verrucosa* | 2018060801 | male | 39.41 | 0.1139 | 0.6646 | 0.7785 |
| *Kaloula verrucosa* | 2018060803 | male | 44.14 | 0.1242 | 0.9066 | 1.0308 |
| *Kaloula verrucosa* | 2018060805 | male | 34.12 | 0.1042 | 0.7231 | 0.8273 |
| *Kaloula verrucosa* | 2018060807 | male | 39.13 | 0.1441 | 1.5141 | 1.6582 |
| *Leptobrachium boringii* | 2020061101 | male | 59.6 | 0.5816 | 2.0113 | 2.5929 |
| *Leptobrachium boringii* | 2020061102 | male | 60.24 | 0.4986 | 2.495 | 2.9936 |
| *Leptobrachium boringii* | 2020061103 | male | 61.6 | 0.5548 | 2.7718 | 3.3266 |
| *Leptobrachium boringii* | 2020061104 | male | 59.36 | 0.4514 | 1.8963 | 2.3477 |
| *Leptobrachella feii* | 2020061901 | male | 21.94 | 0.0158 | 0.0939 | 0.1097 |
| *Leptobrachella feii* | 2020061902 | male | 23.32 | 0.0181 | 0.1465 | 0.1646 |
| *Leptobrachella feii* | 2020061903 | male | 23.62 | 0.0099 | 0.1168 | 0.1267 |
| *Leptobrachella feii* | 2020061904 | male | 21.52 | 0.0146 | 0.1236 | 0.1382 |
| *Leptolalax oshanensis* | 2018070401 | male | 28.3 | 0.012 | 0.1658 | 0.1778 |
| *Leptolalax oshanensis* | 2018070402 | male | 29.22 | 0.0117 | 0.242 | 0.2537 |
| *Leptolalax oshanensis* | 2018070403 | male | 29.48 | 0.0178 | 0.3712 | 0.389 |
| *Leptolalax oshanensis* | 2018070407 | male | 31.42 | 0.0241 | 0.2594 | 0.2835 |
| *Leptolalax vencruiseunctatus* | 2020070401 | male | 28.2 | 0.0058 | 0.1999 | 0.2057 |
| *Leptolalax vencruiseunctatus* | 2020070402 | male | 26 | 0.0218 | 0.1958 | 0.2176 |
| *Leptolalax vencruiseunctatus* | 2020070403 | male | 25.1 | 0.0097 | 0.1554 | 0.1651 |
| *Leptolalax vencruiseunctatus* | 2020070502 | male | 23.9 | 0.0131 | 0.1937 | 0.2068 |
| *Limnonectes fujianensis* | 2020050402 | male | 52.46 | 0.1585 | 1.2979 | 1.4564 |
| *Limnonectes fujianensis* | 2020050403 | male | 51.34 | 0.1696 | 2.5384 | 2.708 |
| *Limnonectes fujianensis* | 2020050404 | male | 46.88 | 0.4575 | 1.3858 | 1.8433 |
| *Limnonectes fujianensis* | 2020050406 | male | 59.72 | 0.1104 | 3.1491 | 3.2595 |
| *Lithobates catesbeinaus* | 2020041904 | male | 135.93 | 5.9082 | 25.467 | 31.3752 |
| *Lithobates catesbeinaus* | 2020041905 | male | 135.47 | 6.3388 | 35.8686 | 42.2074 |
| *Megophrys spinata* | 2020060701 | male | 48.69 | 0.3559 | 1.9058 | 2.2617 |
| *Megophrys spinata* | 2020060702 | male | 46.59 | 0.1862 | 1.8818 | 2.068 |
| *Megophrys spinata* | 2020060703 | male | 50.15 | 0.2466 | 1.6785 | 1.9251 |
| *Megophrys spinata* | 2020060704 | male | 44.97 | 0.375 | 2.1091 | 2.4841 |
| *Microhyla butleri* | 2020070901 | male | 16.18 | 0.0099 | 0.1167 | 0.1266 |
| *Microhyla butleri* | 2020070902 | male | 19.82 | 0.0086 | 0.1189 | 0.1275 |
| *Microhyla butleri* | 2020070903 | male | 20.02 | 0.0073 | 0.0806 | 0.0879 |
| *Microhyla butleri* | 2020070904 | male | 27.98 | 0.0118 | 0.1358 | 0.1476 |
| *Microhyla heymonsi* | 2020070301 | male | 20.11 | 0.0027 | 0.0701 | 0.0728 |
| *Microhyla heymonsi* | 2020070302 | male | 18.54 | 0.0255 | 0.1031 | 0.1286 |
| *Microhyla heymonsi* | 2020070303 | male | 21.52 | 0.026 | 0.1168 | 0.1428 |
| *Microhyla heymonsi* | 2020070305 | male | 25.43 | 0.0142 | 0.092 | 0.1062 |
| *Microhyla ornata* | 2018050101 | male | 19.7 | 0.0071 | 0.1334 | 0.1405 |
| *Microhyla ornata* | 2018050102 | male | 21.5 | 0.0079 | 0.1646 | 0.1725 |
| *Microhyla ornata* | 2018050103 | male | 29.9 | 0.0095 | 0.1622 | 0.1717 |
| *Microhyla ornata* | 2018050104 | male | 26.5 | 0.0079 | 0.165 | 0.1729 |
| *Microhyla pulchra* | 2020041501 | male | 34.56 | 0.0161 | 0.4863 | 0.5024 |
| *Microhyla pulchra* | 2020041503 | male | 28.44 | 0.0131 | 0.3229 | 0.336 |
| *Nanorana pleskei* | 2019071301 | male | 30.1 | 0.0478 | 0.2282 | 0.276 |
| *Nanorana pleskei* | 2019071302 | male | 29.5 | 0.0419 | 0.2602 | 0.3021 |
| *Nanorana pleskei* | 2019071303 | male | 26.5 | 0.0472 | 0.2041 | 0.2513 |
| *Nanorana pleskei* | 2019071304 | male | 37.9 | 0.0455 | 0.3675 | 0.413 |
| *Nidirana yeae* | 2019071801 | male | 59.24 | 0.1788 | 1.9638 | 2.1426 |
| *Nidirana yeae* | 2019071802 | male | 53.33 | 0.1305 | 1.8706 | 2.0011 |
| *Nidirana yeae* | 2019071803 | male | 45.53 | 0.085 | 1.3161 | 1.4011 |
| *Nidirana yeae* | 2019071804 | male | 58.02 | 0.1337 | 1.4206 | 1.5543 |
| *Occidozyga martensii* | 2020070902 | male | 26 | 0.0094 | 0.1616 | 0.171 |
| *Occidozyga martensii* | 2020070903 | male | 16.1 | 0.0209 | 0.2005 | 0.2214 |
| *Occidozyga martensii* | 2020070904 | male | 17.3 | 0.0203 | 0.2413 | 0.2616 |
| *Occidozyga martensii* | 2020070905 | male | 19.81 | 0.0326 | 0.3618 | 0.3944 |
| *Odorrana grahami* | 2018050403 | male | 68.92 | 1.6934 | 6.8964 | 8.5898 |
| *Odorrana grahami* | 2018050404 | male | 66.34 | 1.4958 | 6.4568 | 7.9526 |
| *Odorrana grahami* | 2018050405 | male | 69.04 | 1.2273 | 5.8862 | 7.1135 |
| *Odorrana grahami* | 2018050406 | male | 66.1 | 1.4439 | 5.7754 | 7.2193 |
| *Odorrana graminea* | 2019061401 | male | 44.71 | 0.1929 | 1.9862 | 2.1791 |
| *Odorrana graminea* | 2019061402 | male | 51.89 | 0.1711 | 1.3564 | 1.5275 |
| *Odorrana graminea* | 2019061403 | male | 47.02 | 0.1796 | 1.2122 | 1.3918 |
| *Odorrana graminea* | 2019061404 | male | 45.98 | 0.1572 | 1.2892 | 1.4464 |
| *Odorrana hejiangensis* | 2019070401 | male | 43.23 | 0.5286 | 1.4134 | 1.942 |
| *Odorrana hejiangensis* | 2019070402 | male | 50.13 | 0.4837 | 1.347 | 1.8307 |
| *Odorrana hejiangensis* | 2019070403 | male | 48.02 | 0.2764 | 1.6724 | 1.9488 |
| *Odorrana hejiangensis* | 2019070405 | male | 45.02 | 0.4837 | 1.4368 | 1.9205 |
| *Odorrana lungshengensis* | 2019070701 | male | 63.11 | 0.7334 | 3.8862 | 4.6196 |
| *Odorrana lungshengensis* | 2019070703 | male | 64.28 | 0.3605 | 2.9616 | 3.3221 |
| *Odorrana lungshengensis* | 2019070707 | male | 76.91 | 0.5465 | 4.1181 | 4.6646 |
| *Odorrana margaretae* | 2018061802 | male | 73.21 | 1.3405 | 5.7737 | 7.1142 |
| *Odorrana margaretae* | 2018061810 | male | 72.5 | 1.1089 | 6.4588 | 7.5677 |
| *Odorrana margaretae* | 2018061811 | male | 68.13 | 1.472 | 7.7711 | 9.2431 |
| *Odorrana margaretae* | 2018061812 | male | 74.16 | 1.4878 | 8.9756 | 10.4634 |
| *Odorrana nasuta* | 2020061403 | male | 58.46 | 0.3595 | 2.882 | 3.2415 |
| *Odorrana nasuta* | 2020061404 | male | 57.48 | 0.3102 | 2.3476 | 2.6578 |
| *Odorrana nasuta* | 2020061405 | male | 58.36 | 0.3559 | 2.5715 | 2.9274 |
| *Odorrana nasuta* | 2020061406 | male | 63.58 | 0.4163 | 2.6032 | 3.0195 |
| *Odorrana schmackeri* | 2019061901 | male | 40.61 | 0.1059 | 0.9662 | 1.0721 |
| *Odorrana schmackeri* | 2019061902 | male | 44.59 | 0.1274 | 1.148 | 1.2754 |
| *Odorrana schmackeri* | 2019061904 | male | 50.95 | 0.0967 | 5.2184 | 5.3151 |
| *Odorrana schmackeri* | 2019061906 | male | 54.65 | 0.1704 | 3.3401 | 3.5105 |
| *Odorrana tiannanensis* | 2020060901 | male | 70.13 | 0.5436 | 4.2902 | 4.8338 |
| *Odorrana tiannanensis* | 2020060903 | male | 72.77 | 0.8524 | 6.4654 | 7.3178 |
| *Oreolalax rugosus* | 2018070101 | male | 46.96 | 0.2962 | 0.9016 | 1.1978 |
| *Oreolalax rugosus* | 2018070102 | male | 50.84 | 0.4166 | 1.134 | 1.5506 |
| *Paa boulengeri* | 2020061701 | male | 70.78 | 2.2212 | 6.5286 | 8.7498 |
| *Paa boulengeri* | 2020061702 | male | 72.57 | 1.9657 | 8.6473 | 10.613 |
| *Paa boulengeri* | 2020061703 | male | 69.21 | 1.1557 | 7.6817 | 8.8374 |
| *Paa boulengeri* | 2020061704 | male | 71.44 | 2.9862 | 16.9644 | 19.9506 |
| *Paa yunnanensis* | 2020060401 | male | 58.72 | 1.3316 | 5.0992 | 6.4308 |
| *Paa yunnanensis* | 2020060403 | male | 61.56 | 1.5561 | 4.9052 | 6.4613 |
| *Paa yunnanensis* | 2020060404 | male | 60.88 | 1.7394 | 11.1558 | 12.8952 |
| *Paa yunnanensis* | 2020060405 | male | 61.24 | 1.5817 | 10.6882 | 12.2699 |
| *Pelophylax hubeiensis* | 2019041301 | male | 35.28 | 0.104 | 0.4646 | 0.5686 |
| *Pelophylax hubeiensis* | 2019041302 | male | 39.12 | 0.0982 | 0.7936 | 0.8918 |
| *Pelophylax hubeiensis* | 2019041303 | male | 43.01 | 0.0897 | 0.5687 | 0.6584 |
| *Pelophylax hubeiensis* | 2019041307 | male | 49.79 | 0.1209 | 0.7251 | 0.846 |
| *Pelophylax nigromaculatus* | 2018060434 | male | 71.24 | 0.5698 | 5.819 | 6.3888 |
| *Pelophylax nigromaculatus* | 2018060440 | male | 69.87 | 1.0985 | 5.97 | 7.0685 |
| *Pelophylax nigromaculatus* | 2018060441 | male | 67.56 | 0.8269 | 5.2382 | 6.0651 |
| *Pelophylax nigromaculatus* | 2018060443 | male | 62.93 | 0.6444 | 3.7804 | 4.4248 |
| *Pelophylax pleuraden* | 2020061604 | male | 44.87 | 0.3172 | 4.9075 | 5.2247 |
| *Pelophylax pleuraden* | 2020061608 | male | 54.38 | 0.2874 | 3.5356 | 3.823 |
| *Pelophylax pleuraden* | 2020061610 | male | 54.87 | 0.3587 | 2.9066 | 3.2653 |
| *Pelophylax pleuraden* | 2020061611 | male | 51.26 | 0.3823 | 2.9754 | 3.3577 |
| *Polypedates megacephalus* | 2020041901 | male | 41.9 | 0.0973 | 0.5921 | 0.6894 |
| *Polypedates megacephalus* | 2020041902 | male | 45.3 | 0.1393 | 0.8655 | 1.0048 |
| *Polypedates megacephalus* | 2020041905 | male | 49 | 0.0688 | 0.9167 | 0.9855 |
| *Polypedates megacephalus* | 2020041906 | male | 43.4 | 0.0647 | 0.9213 | 0.986 |
| *Polypedates mutus* | 2020061101 | male | 42.7 | 0.0936 | 0.4903 | 0.5839 |
| *Polypedates mutus* | 2020061102 | male | 46.19 | 0.0757 | 0.7373 | 0.813 |
| *Polypedates mutus* | 2020061103 | male | 45.21 | 0.0603 | 0.7002 | 0.7605 |
| *Polypedates mutus* | 2020061104 | male | 39.41 | 0.0632 | 0.6598 | 0.723 |
| *Pseudorana weiningensis* | 2020070802 | male | 38.91 | 0.0717 | 0.7753 | 0.847 |
| *Pseudorana weiningensis* | 2020070804 | male | 38.92 | 0.0158 | 0.3958 | 0.4116 |
| *Pseudorana weiningensis* | 2020070806 | male | 33.57 | 0.0608 | 0.6717 | 0.7325 |
| *Pseudorana weiningensis* | 2020070809 | male | 33.4 | 0.0273 | 0.3896 | 0.4169 |
| *Rana chaochiaoensis* | 2018060110 | male | 55.13 | 0.133 | 1.7053 | 1.8383 |
| *Rana chaochiaoensis* | 2018060119 | male | 51.23 | 0.1903 | 1.7384 | 1.9287 |
| *Rana chaochiaoensis* | 2018060127 | male | 46.1 | 0.1055 | 1.6981 | 1.8036 |
| *Rana chaochiaoensis* | 2018060145 | male | 49.16 | 0.2508 | 1.6681 | 1.9189 |
| *Rana chensinensis* | 2019070101 | male | 34.95 | 0.0367 | 0.7932 | 0.8299 |
| *Rana chensinensis* | 2019070102 | male | 48.79 | 0.0439 | 1.5434 | 1.5873 |
| *Rana chensinensis* | 2019070105 | male | 46.54 | 0.1031 | 0.9607 | 1.0638 |
| *Rana chensinensis* | 2019070106 | male | 46.92 | 0.3299 | 0.7515 | 1.0814 |
| *Rana hanluica* | 2019041701 | male | 49.3 | 0.0772 | 1.1541 | 1.2313 |
| *Rana hanluica* | 2019041702 | male | 49.5 | 0.1058 | 1.0591 | 1.1649 |
| *Rana hanluica* | 2019041703 | male | 46.53 | 0.0965 | 0.9392 | 1.0357 |
| *Rana hanluica* | 2019041704 | male | 42.9 | 0.0877 | 1.9879 | 2.0756 |
| *Rana hanluica* | 2019041705 | male | 54 | 0.102 | 1.8638 | 1.9658 |
| *Rana hanluica* | 2019041706 | male | 48.17 | 0.1046 | 2.1369 | 2.2415 |
| *Rana kukunoris* | 2020071202 | male | 46.15 | 0.1757 | 0.8052 | 0.9809 |
| *Rana kukunoris* | 2020071203 | male | 46.96 | 0.1404 | 1.013 | 1.1534 |
| *Rana kukunoris* | 2020071205 | male | 49.15 | 0.2397 | 2.336 | 2.5757 |
| *Rana kukunoris* | 2020071206 | male | 54.97 | 0.2182 | 2.1338 | 2.352 |
| *Rana omeimontis* | 2018101401 | male | 47.22 | 0.2385 | 2.5614 | 2.7999 |
| *Rana omeimontis* | 2018100402 | male | 55.56 | 0.3826 | 3.1263 | 3.5089 |
| *Rana omeimontis* | 2018100404 | male | 57.11 | 0.0945 | 1.0093 | 1.1038 |
| *Rana omeimontis* | 2018100410 | male | 46.11 | 0.1035 | 1.3571 | 1.4606 |
| *Rhacophorus dugritei* | 2020061101 | male | 46.86 | 0.0908 | 0.7776 | 0.8684 |
| *Rhacophorus dugritei* | 2020061102 | male | 43.96 | 0.0609 | 0.5728 | 0.6337 |
| *Rhacophorus dugritei* | 2020061105 | male | 46.86 | 0.0853 | 0.7567 | 0.842 |
| *Rhacophorus dugritei* | 2020061106 | male | 40.68 | 0.1421 | 0.8265 | 0.9686 |
| *Rhacophorus omeimontis* | 2018050601 | male | 59.93 | 0.3256 | 1.8289 | 2.1545 |
| *Rhacophorus omeimontis* | 2018050608 | male | 62.24 | 0.3818 | 1.6394 | 2.0212 |
| *Rhacophorus omeimontis* | 2018050610 | male | 57.31 | 0.3255 | 2.7491 | 3.0746 |
| *Rhacophorus omeimontis* | 2018050611 | male | 59.72 | 0.2075 | 1.9058 | 2.1133 |
| *Scutiger chintingensis* | 2020061402 | male | 43.24 | 0.1596 | 0.4125 | 0.5721 |
| *Scutiger chintingensis* | 2020061403 | male | 43.16 | 0.1182 | 0.3749 | 0.4931 |
| *Scutiger glandulatus* | 2017061201 | male | 63.09 | 0.2294 | 1.3611 | 1.5905 |
| *Scutiger glandulatus* | 2017061202 | male | 65.31 | 0.3026 | 1.5663 | 1.8689 |
| *Amolops chunganensis* | 2020061501 | female | 39.8 | 0.0834 | 1.4076 | 1.491 |
| *Amolops chunganensis* | 2020061504 | female | 43.2 | 0.1058 | 1.6272 | 1.733 |
| *Amolops loloensis* | 2020071407 | female | 69.9 | 0.8826 | 9.0214 | 9.904 |
| *Amolops loloensis* | 2020071408 | female | 81.9 | 1.1366 | 10.2234 | 11.36 |
| *Amolops mantzorum* | 2018051407 | female | 74.52 | 0.5226 | 3.8854 | 4.408 |
| *Amolops mantzorum* | 2018051408 | female | 75.36 | 0.5874 | 3.9479 | 4.5353 |
| *Amolops mantzorum* | 2018051409 | female | 68.98 | 0.4798 | 4.6782 | 5.158 |
| *Amolops mantzorum* | 2018051410 | female | 67.54 | 0.3946 | 3.2137 | 3.6083 |
| *Amolops ricketti* | 2020060703 | female | 53.02 | 0.3329 | 4.8277 | 5.1606 |
| *Amolops ricketti* | 2020060705 | female | 51.98 | 0.2255 | 3.2535 | 3.479 |
| *Amolops sinensis* | 2019061101 | female | 51.24 | 0.2044 | 4.1337 | 4.3381 |
| *Amolops sinensis* | 2019061106 | female | 58.56 | 0.2288 | 2.4183 | 2.6471 |
| *Amolops torrentis* | 2019071404 | female | 56.76 | 0.3282 | 2.5687 | 2.8969 |
| *Amolops torrentis* | 2019071406 | female | 60.24 | 0.4208 | 4.1927 | 4.6135 |
| *Aquixalus palpebralis* | 2020061502 | female | 36.8 | 0.0343 | 0.2497 | 0.284 |
| *Bombina maxima* | 2013041001 | female | 49.21 | 0.1566 | 1.1846 | 1.3412 |
| *Bombina maxima* | 2013041002 | female | 55.59 | 0.3012 | 1.2782 | 1.5794 |
| *Bufo andrewsi* | 2019041409 | female | 96.41 | 1.9332 | 8.1785 | 10.1117 |
| *Bufo andrewsi* | 2019041410 | female | 92.63 | 2.8552 | 8.2801 | 11.1353 |
| *Bufo andrewsi* | 2019041411 | female | 89.36 | 1.4611 | 7.7332 | 9.1943 |
| *Bufo andrewsi* | 2019041412 | female | 92.4 | 1.9981 | 9.115 | 11.1131 |
| *Bufo gargarizans* | 2018031212 | female | 123.26 | 4.1116 | 19.333 | 23.4446 |
| *Bufo gargarizans* | 2018031213 | female | 119.14 | 3.9877 | 17.1551 | 21.1428 |
| *Bufo gargarizans* | 2018031214 | female | 116.57 | 3.6482 | 15.7683 | 19.4165 |
| *Bufo gargarizans* | 2018031215 | female | 131.43 | 4.5405 | 20.1276 | 24.6681 |
| *Bufo melanostictus* | 2018050201 | female | 61.55 | 0.7219 | 1.5222 | 2.2441 |
| *Bufo melanostictus* | 2018050202 | female | 63.71 | 0.6984 | 1.6445 | 2.3429 |
| *Bufo melanostictus* | 2018050203 | female | 68.3 | 0.943 | 2.0867 | 3.0297 |
| *Bufo melanostictus* | 2018050204 | female | 64.17 | 0.7775 | 1.9898 | 2.7673 |
| *Bufo minshanicus* | 2018071305 | female | 70.42 | 0.6048 | 2.07 | 2.6748 |
| *Bufo minshanicus* | 2018071308 | female | 65.56 | 0.6551 | 2.0721 | 2.7272 |
| *Bufo minshanicus* | 2018071309 | female | 61.38 | 0.3138 | 2.3578 | 2.6716 |
| *Bufo minshanicus* | 2018071310 | female | 72.64 | 0.7547 | 1.3195 | 2.0742 |
| *Bufo tibetanus* | 2019070101 | female | 73.4 | 1.3722 | 3.0411 | 4.4133 |
| *Bufo tibetanus* | 2019070102 | female | 80.6 | 2.3566 | 3.4477 | 5.8043 |
| *Calluella yunnanensis* | 2020071102 | female | 34.82 | 0.0095 | 0.0528 | 0.0623 |
| *Calluella yunnanensis* | 2020071104 | female | 34.78 | 0.0079 | 0.04518 | 0.05308 |
| *Chirixalus doriae* | 2020070703 | female | 23.9 | 0.0033 | 0.0718 | 0.0751 |
| *Chirixalus doriae* | 2020070705 | female | 24.4 | 0.0039 | 0.0698 | 0.0737 |
| *Chirixalus vittatus* | 2020071403 | female | 31.9 | 0.0151 | 0.2007 | 0.2158 |
| *Feirana quadranus* | 2018050106 | female | 99.66 | 1.9996 | 20.9001 | 22.8997 |
| *Feirana quadranus* | 2018050107 | female | 92.16 | 1.9243 | 18.7412 | 20.6655 |
| *Feirana quadranus* | 2018050108 | female | 102.46 | 1.6375 | 17.386 | 19.0235 |
| *Feirana quadranus* | 2018050110 | female | 90.92 | 1.8962 | 16.1983 | 18.0945 |
| *Fejervarya multistriata* | 2019040201 | female | 44.1 | 0.2383 | 0.6948 | 0.9331 |
| *Fejervarya multistriata* | 2019040202 | female | 39 | 0.2032 | 0.7226 | 0.9258 |
| *Fejervarya multistriata* | 2019040211 | female | 41.85 | 0.2146 | 0.5103 | 0.7249 |
| *Fejervarya multistriata* | 2019040212 | female | 39.85 | 0.1847 | 0.4971 | 0.6818 |
| *Hyla annectans wulingensis* | 2020050406 | female | 39.22 | 0.0565 | 0.3189 | 0.3754 |
| *Hyla annectans wulingensis* | 2020050408 | female | 35.78 | 0.0499 | 0.3059 | 0.3558 |
| *Hyla tsinlingensis* | 2018050701 | female | 41.7 | 0.1056 | 0.4852 | 0.5908 |
| *Hylarana guentheri* | 2018041214 | female | 65.93 | 0.4312 | 4.7358 | 5.167 |
| *Hylarana guentheri* | 2018041215 | female | 67.18 | 0.4013 | 4.4836 | 4.8849 |
| *Hylarana guentheri* | 2018041216 | female | 73.27 | 0.4978 | 4.9281 | 5.4259 |
| *Hylarana guentheri* | 2018041217 | female | 58.82 | 0.3801 | 3.5661 | 3.9462 |
| *Kaloula pulchra* | 2020070103 | female | 70.2 | 0.8845 | 5.6227 | 6.5072 |
| *Kaloula pulchra* | 2020070104 | female | 88.2 | 1.0509 | 5.8225 | 6.8734 |
| *Kaloula rugifera* | 2018050405 | female | 28.56 | 0.0217 | 0.3392 | 0.3609 |
| *Kaloula rugifera* | 2018050406 | female | 29.84 | 0.0255 | 0.3582 | 0.3837 |
| *Kaloula verrucosa* | 2018060808 | female | 44.2 | 0.0916 | 0.7772 | 0.8688 |
| *Kaloula verrucosa* | 2018060810 | female | 41.6 | 0.1006 | 0.75 | 0.8506 |
| *Leptobrachium boringii* | 2020061103 | female | 61.14 | 0.4093 | 2.4607 | 2.87 |
| *Leptobrachium boringii* | 2020061104 | female | 61.06 | 0.5879 | 4.6427 | 5.2306 |
| *Leptobrachella feii* | 2020061903 | female | 27.52 | 0.0201 | 0.1932 | 0.2133 |
| *Leptobrachella feii* | 2020061904 | female | 28.68 | 0.0219 | 0.2266 | 0.2485 |
| *Leptolalax oshanensis* | 2018070403 | female | 23.33 | 0.0092 | 0.1641 | 0.1733 |
| *Leptolalax oshanensis* | 2018070405 | female | 27.67 | 0.0142 | 0.2377 | 0.2519 |
| *Leptolalax vencruiseunctatus* | 2020070403 | female | 27.21 | 0.0053 | 0.1093 | 0.1146 |
| *Leptolalax vencruiseunctatus* | 2020070404 | female | 24.79 | 0.0065 | 0.1121 | 0.1186 |
| *Limnonectes fujianensis* | 2020050404 | female | 41.26 | 0.1599 | 1.5118 | 1.6717 |
| *Limnonectes fujianensis* | 2020050405 | female | 36.34 | 0.1405 | 1.2412 | 1.3817 |
| *Lithobates catesbeinaus* | 2020041912 | female | 138.77 | 5.488 | 41.0964 | 46.5844 |
| *Lithobates catesbeinaus* | 2020041913 | female | 140.63 | 6.441 | 45.8652 | 52.3062 |
| *Megophrys spinata* | 2020060703 | female | 58.42 | 0.2513 | 0.6011 | 0.8524 |
| *Megophrys spinata* | 2020060704 | female | 66.58 | 0.3459 | 0.8863 | 1.2322 |
| *Microhyla butleri* | 2020070903 | female | 26.38 | 0.0085 | 0.1208 | 0.1293 |
| *Microhyla butleri* | 2020070904 | female | 24.82 | 0.0063 | 0.1368 | 0.1431 |
| *Microhyla heymonsi* | 2020070302 | female | 24.4 | 0.0263 | 0.2075 | 0.2338 |
| *Microhyla heymonsi* | 2020070303 | female | 24.42 | 0.0217 | 0.1643 | 0.186 |
| *Microhyla ornata* | 2018050107 | female | 22.83 | 0.1032 | 0.3983 | 0.5015 |
| *Microhyla ornata* | 2018050108 | female | 27.66 | 0.0946 | 0.5973 | 0.6919 |
| *Microhyla ornata* | 2018050109 | female | 25.51 | 0.1121 | 0.5271 | 0.6392 |
| *Microhyla ornata* | 2018050110 | female | 21.2 | 0.1117 | 0.3897 | 0.5014 |
| *Microhyla pulchra* | 2020041504 | female | 35.17 | 0.1168 | 1.0144 | 1.1312 |
| *Microhyla pulchra* | 2020041505 | female | 35.23 | 0.1352 | 0.8724 | 1.0076 |
| *Nanorana pleskei* | 2019071304 | female | 35 | 0.0498 | 0.3208 | 0.3706 |
| *Nanorana pleskei* | 2019071305 | female | 35.2 | 0.056 | 0.3994 | 0.4554 |
| *Nidirana yeae* | 2019071803 | female | 48.81 | 0.1178 | 1.8091 | 1.9269 |
| *Nidirana yeae* | 2019071804 | female | 51.19 | 0.1432 | 1.9321 | 2.0753 |
| *Occidozyga martensii* | 2020070905 | female | 26.78 | 0.0413 | 0.2203 | 0.2616 |
| *Occidozyga martensii* | 2020070908 | female | 25.82 | 0.0375 | 0.3065 | 0.344 |
| *Odorrana grahami* | 2018050407 | female | 88.54 | 1.4275 | 13.0981 | 14.5256 |
| *Odorrana grahami* | 2018050408 | female | 92.26 | 1.6877 | 14.5277 | 16.2154 |
| *Odorrana graminea* | 2019061405 | female | 93.25 | 1.5929 | 6.024 | 7.6169 |
| *Odorrana graminea* | 2019061406 | female | 88.46 | 1.1711 | 16.3564 | 17.5275 |
| *Odorrana graminea* | 2019061407 | female | 95.22 | 1.596 | 20.2122 | 21.8082 |
| *Odorrana graminea* | 2019061408 | female | 96.27 | 1.544 | 24.4374 | 25.9814 |
| *Odorrana hejiangensis* | 2019070405 | female | 79.75 | 0.7019 | 8.8989 | 9.6008 |
| *Odorrana hejiangensis* | 2019070406 | female | 81.45 | 0.7553 | 8.4165 | 9.1718 |
| *Odorrana lungshengensis* | 2019070704 | female | 58.68 | 0.185 | 0.874 | 1.059 |
| *Odorrana lungshengensis* | 2019070705 | female | 69.12 | 0.2238 | 1.478 | 1.7018 |
| *Odorrana margaretae* | 2018061807 | female | 91 | 1.5402 | 10.896 | 12.4362 |
| *Odorrana margaretae* | 2018061808 | female | 93.2 | 1.8302 | 12.2554 | 14.0856 |
| *Odorrana nasuta* | 2020061401 | female | 104.23 | 1.6595 | 16.8805 | 18.54 |
| *Odorrana nasuta* | 2020061407 | female | 82.97 | 1.3617 | 16.6177 | 17.9794 |
| *Odorrana schmackeri* | 2019061909 | female | 77.17 | 0.591 | 1.9905 | 2.5815 |
| *Odorrana schmackeri* | 20190619010 | female | 79.23 | 0.5266 | 2.5089 | 3.0355 |
| *Odorrana tiannanensis* | 2020060904 | female | 47.73 | 0.5002 | 2.2765 | 2.7767 |
| *Odorrana tiannanensis* | 2020060905 | female | 48.47 | 0.457 | 2.4983 | 2.9553 |
| *Oreolalax rugosus* | 2018070103 | female | 47.11 | 0.2112 | 1.1131 | 1.3243 |
| *Oreolalax rugosus* | 2018070104 | female | 50.69 | 0.3208 | 1.1033 | 1.4241 |
| *Paa boulengeri* | 2020061703 | female | 71.33 | 1.0221 | 13.5091 | 14.5312 |
| *Paa boulengeri* | 2020061704 | female | 68.27 | 0.9093 | 10.6957 | 11.605 |
| *Paa yunnanensis* | 2020060404 | female | 81.6 | 1.2541 | 7.4078 | 8.6619 |
| *Paa yunnanensis* | 2020060407 | female | 102 | 3.2453 | 21.2618 | 24.5071 |
| *Pelophylax hubeiensis* | 2019041310 | female | 69.91 | 0.417 | 4.4206 | 4.8376 |
| *Pelophylax hubeiensis* | 2019041302 | female | 70.69 | 0.4826 | 8.258 | 8.7406 |
| *Pelophylax nigromaculatus* | 2018060404 | female | 82.29 | 0.5698 | 5.6396 | 6.2094 |
| *Pelophylax nigromaculatus* | 2018060243 | female | 79.15 | 1.0985 | 6.0848 | 7.1833 |
| *Pelophylax nigromaculatus* | 2018060407 | female | 91.56 | 0.4597 | 6.9732 | 7.4329 |
| *Pelophylax nigromaculatus* | 2018060408 | female | 95.8 | 0.3444 | 6.7804 | 7.1248 |
| *Pelophylax pleuraden* | 2020061606 | female | 74.8 | 0.6133 | 6.3247 | 6.938 |
| *Pelophylax pleuraden* | 2020061607 | female | 75.8 | 0.4838 | 7.0535 | 7.5373 |
| *Pelophylax pleuraden* | 2020061608 | female | 71.2 | 0.3988 | 7.9754 | 8.3742 |
| *Pelophylax pleuraden* | 2020061609 | female | 78.4 | 0.7145 | 6.0848 | 6.7993 |
| *Polypedates megacephalus* | 2020041905 | female | 63.49 | 0.2938 | 1.8767 | 2.1705 |
| *Polypedates megacephalus* | 2020041906 | female | 57.11 | 0.334 | 2.9287 | 3.2627 |
| *Polypedates mutus* | 2020061106 | female | 58.58 | 0.2367 | 1.5033 | 1.74 |
| *Polypedates mutus* | 2020061107 | female | 58.42 | 0.2727 | 1.7023 | 1.975 |
| *Pseudorana weiningensis* | 2020070807 | female | 32.34 | 0.0216 | 0.5338 | 0.5554 |
| *Pseudorana weiningensis* | 2020070808 | female | 39.66 | 0.0498 | 0.5618 | 0.6116 |
| *Rana chaochiaoensis* | 2020060107 | female | 71.48 | 0.3335 | 3.9004 | 4.2339 |
| *Rana chaochiaoensis* | 2018060119 | female | 52.92 | 0.2445 | 2.9688 | 3.2133 |
| *Rana chensinensis* | 2019070108 | female | 61.49 | 0.4277 | 6.7868 | 7.2145 |
| *Rana chensinensis* | 2019070109 | female | 57.16 | 0.3539 | 5.4983 | 5.8522 |
| *Rana chensinensis* | 2019070110 | female | 56.87 | 0.3313 | 5.8025 | 6.1338 |
| *Rana chensinensis* | 2019070111 | female | 72.88 | 0.5911 | 8.164 | 8.7551 |
| *Rana hanluica* | 2019041706 | female | 53.88 | 0.1799 | 2.3641 | 2.544 |
| *Rana hanluica* | 2019041707 | female | 57.32 | 0.3033 | 3.0843 | 3.3876 |
| *Rana kukunoris* | 2018071202 | female | 57.66 | 0.2368 | 1.9087 | 2.1455 |
| *Rana kukunoris* | 2018071204 | female | 52 | 0.1006 | 1.3115 | 1.4121 |
| *Rana kukunoris* | 2018071209 | female | 49.5 | 0.0836 | 1.1202 | 1.2038 |
| *Rana kukunoris* | 2020071210 | female | 49.64 | 0.0982 | 1.2108 | 1.309 |
| *Rana omeimontis* | 2018101415 | female | 66.23 | 0.2125 | 2.9884 | 3.2009 |
| *Rana omeimontis* | 2018100416 | female | 68.81 | 0.2915 | 3.4102 | 3.7017 |
| *Rhacophorus dugritei* | 2020061101 | female | 47.25 | 0.2681 | 1.4732 | 1.7413 |
| *Rhacophorus dugritei* | 2020061102 | female | 58.75 | 0.3737 | 1.9256 | 2.2993 |
| *Rhacophorus omeimontis* | 2018050611 | female | 76.06 | 1.0925 | 5.4419 | 6.5344 |
| *Rhacophorus omeimontis* | 2018050608 | female | 74.54 | 0.8415 | 3.2235 | 4.065 |
| *Scutiger chintingensis* | 2020061401 | female | 50.2 | 0.1596 | 0.5124 | 0.672 |
| *Scutiger chintingensis* | 2020061404 | female | 50.24 | 0.1182 | 0.5126 | 0.6308 |
| *Scutiger glandulatus* | 2017061201 | female | 70.8 | 0.4663 | 1.6189 | 2.0852 |

Table S3. Genbank accession numbers used for phylogeny construction.

| Species | 12S | 16S | COI | CYTB | ND2 | ND4 | RAG1 | RHOD | TYR |
| --- | --- | --- | --- | --- | --- | --- | --- | --- | --- |
| *Amolops chunganensis* | KX645666 | KX645666 | KX645666 | KX645666 | KX645666 | KX645666 | KU840719 |  | KU840752 |
| *Amolops loloensis* | KF771288 | KT750963 | KT750963 | KT750963 | KY357479 | KT750963 | KX208690 |  | KY357486 |
| *Amolops mantzorum* | DQ359970 | MK604858 | KJ546429 | KJ008405 | KJ546429 | KF771309 | EF088240 | DQ360023 | DQ360054 |
| *Amolops ricketti* | NC_023949 | KF956111 | KF956111 | KF956111 | KF956111 | KF771310 | KX208724 | DQ360009 | EU076764 |
| *Amolops sinensis* |  | MK263279 | MK263320 |  | MN958804 |  |  |  |  |
| *Amolops torrentis* | MG991872 | DQ204489 | MG991932 |  | MN958785 |  | KU840715 |  |  |
| *Aquixalus palpebralis* | EU924625 | GQ285681 | DQ468683 | EU924597 |  |  | GQ285773 | GQ285792 | GQ285810 |
| *Bombina maxima* | DQ925758 | JX893181 | JX893181 | EU531274 | JX893181 | EU789363 |  |  |  |
| *Bufo andrewsi* | AF160764 | FJ882808 | MF805611 | AF174502 | AY607301 |  | DQ158353 | DQ283905 |  |
| *Bufo gargarizans* | AF205541 | FJ882843 | KY385685 | AF171196 | KU321581 | DQ275350 | KF666177 |  |  |
| *Bufo melanostictus* | AB167899 | KJ697684 | AJ584640 | AF249082 | KT031590 | DQ904392 | KT031693 | AF249097 |  |
| *Bufo minshanicus* | KM587710 | KM587710 | KY385799 | KM587710 | KM587710 | KM587710 |  |  |  |
| *Bufo tibetanus* | AF160766 | JX878885 | HM582424 | AF171193 | KX269407 | JX878885 |  |  |  |
| *Calluella yunnanensis* | AB634626 | KM509102 | KM509769 |  |  |  |  |  | KM509902 |
| *Chirixalus doriae* | EF564446 | AB813159 | KR087631 | GQ204538 |  |  | GQ204602 | GQ204657 | DQ347165 |
| *Chirixalus vittatus* | EF564448 | DQ283134 | KR087649 | EU924596 |  |  | GQ204603 | GQ204658 | EU924568 |
| *Feirana quadranus* | GQ225906 | AB200967 |  |  | GQ225933 |  | HM163591 | EU979886 | EU979981 |
| *Fejervarya limnocharis* | AB277282 | KR071859 | KR071859 | AB296096 | KR071859 | KR071859 | AB526660 | DQ458271 | AB500265 |
| *Hyla annectans wulingensis* | KP742563 | KP742692 |  |  |  |  |  |  |  |
| *Hyla tsinlingensis* | KP742646 | KP212702 | KP212702 | JX870448 | KP212702 | KP212702 |  |  |  |
| *Hylarana guentheri* | KF185024 | KR264039 | KM035413 | KM035413 | KM035413 | KM035413 | KX208782 | AY322216 | KR264440 |
| *Kaloula pulchra* | AY458595 | DQ283398 | AY458595 | AY458595 | AY458595 | AY458595 | KX208748 | DQ284011 | KC180289 |
| *Kaloula rugifera* | NC_029409 | KT878719 | KT878719 | KT878719 | KT878719 |  |  |  |  |
| *Kaloula verrucosa* | JX678893 | NC 039411 | NC 039411 | NC_039411 | NC 039411 | NC 039411 |  |  |  |
| *Leptobrachella feii* |  | MT302635 |  |  |  |  |  |  |  |
| *Leptobrachium boringii* | KJ630505 | MH643882 | KJ630505 | MH643882 | KJ630505 | KJ630505 | MH056123 | KX812400 |  |
| *Leptolalax oshanensis* | NC_020610 | KX811928 | KC460337 | KC460337 | KC460337 | KC460337 | MH056094 | MH056153 |  |
| *Leptolalax ventripunctatus* | LC201979 | KX811929 | KR087772 |  |  |  | MH056090 | MH056133 |  |
| *Limnonectes fujianensis* | AY974191 | HM067232 | NC 007440 | FJ349544 | NC 007440 | NC 007440 | KX208751 | DQ458260 | DQ458275 |
| *Lithobates catesbeianus* | MN241124 | DQ289127 | AB761267 | AF205089 | AF314016 | MN241124 | AB612037 | S79840 | DQ360044 |
| *Megophrys spinata* |  | KX811864 | KX812120 | AY561317 |  |  | KX812231 | KX812349 |  |
| *Microhyla butleri* | KT285802 | KT285802 | KT972718 | KT972718 | KT972718 | KT285802 | EF396094 |  |  |
| *Microhyla heymonsi* | AY458596 | MT808958 | AY458596 | AY458596 | AY458596 | AY458596 | KX208756 |  | EF395979 |
| *Microhyla ornata* | JN541317 | DQ512876 | DQ512876 | AB201223 | DQ512876 | DQ512876 | AY364198 | AY364383 | KC180221 |
| *Microhyla pulchra* | NC_024547 | LC465692 | KF798195 | KF798195 | KF798195 |  | EF396093 | KU840623 | EF395980 |
| *Nanorana pleskei* | EU979781 | HQ324232 | HQ324232 | HQ324232 | GQ225879 | HQ324232 | HM163586 | EU979871 | EU979962 |
| *Nidirana yeae* |  | MN295230 | MN295238 |  |  |  |  |  |  |
| *Occidozyga martensii* | GU177877 | DQ283357 | GU177877 | GU177877 | GU177877 | GU177877 | KU243099 | DQ283978 | KU243119 |
| *Odorrana grahami* | KU840529 | KF185051 | MH697567 |  | EU861580 | KF771313 | EF088257 | DQ360016 | DQ360047 |
| *Odorrana graminea* | NC_050884 | KF185037 | NC 050884 | NC_050884 | KR338281 | NC 050884 | KP221672 | KU840632 | KP191588 |
| *Odorrana hejiangensis* | KU840531 | KF185052 |  |  | KR338211 |  | KU840727 | KU840683 | KU840788 |
| Odorrana lungshengensis | KF185018 | KF185054 | KF771336 |  | KX269407 |  |  |  |  |
| Odorrana margaretae | DQ359964 | KF185035 | KJ815050 | KU217223 | EU861592 | KJ815050 | EF088261 | DQ360017 | DQ360048 |
| *Odorrana nasuta* | KF185017 | KF185053 |  |  |  |  |  |  |  |
| *Odorrana schmackeri* | KP732086 | KF185047 | KJ149452 | KP732086 | GU812150 | KP732086 | KX208784 | DQ360020 | KP191589 |
| *Odorrana tiannanensis* | KF185008 | KF185044 | KR087846 |  |  |  |  |  |  |
| *Oreolalax rugosus* | EF397254 | EF397254 |  |  |  |  |  |  |  |
| *Paa boulengeri* | EU979791 | KC686711 | KX233867 | JX676597 | KX233867 | KF199152 | HM163604 | EU979918 | EU980033 |
| *Paa yunnanensis* | GQ225869 | KF199150 | KF199150 | KF199150 | GQ225878 | KF199150 | HM163593 | DQ458263 | EU979976 |
| *Pelophylax hubeiensis* | AF205547 | AF315137 |  | JQ995009 |  |  |  |  |  |
| *Pelophylax nigromaculatus* | AB705490 | KX269216 | KT878718 | DQ006266 | GU812150 | KT878718 | AB360184 | DQ283838 | DQ360045 |
| *Pelophylax pleuraden* | JN541324 | JQ621943 | HQ395289 | KR264150 |  | KF771303 | KR264384 | DQ360011 | DQ360042 |
| *Polypedates megacephalus* | KU840483 | KC465836 | AY458598 | AB451722 | NC 043955 | NC 043955 | EU924517 | EU924545 | KC180271 |
| *Polypedates mutus* | AY880608 | MW266017 | MG935684 | MK622900 |  | MK622900 | GQ285770 | EU215581 | EU215611 |
| *Pseudorana weiningensis* | DQ359959 | KX269217 |  | KX269362 | KX269432 |  | KX269582 | DQ360012 | DQ360050 |
| *Rana chaochiaoensis* | DQ359975 | KX269192 | KU246048 | AF274927 | KU246048 | KF771302 | KX269557 | DQ360028 | DQ360059 |
| *Rana chensinensis* | AB058853 | KF185061 | MT418625 | AF077396 | GU812150 | KF771317 | KX269551 | DQ360030 | DQ360061 |
| *Rana hanluica* | KX269191 | KX269191 | MT418638 | KX269338 | KX269407 |  | KX269556 |  | KX269784 |
| *Rana kukunoris* | KX269185 | KU246049 | MN733918 | JX486345 | MN733918 | MN733918 | GQ285780 | GQ285798 | GQ285816 |
| *Rana omeimontis* | DQ289083 | KU246050 | KU246050 | AF274928 | KU246050 | KU246050 | KX269558 |  | KX269785 |
| *Rhacophorus dugritei* | EF564471 | LC010584 | KP996709 | EU924605 | MK357046 |  | GQ285768 | EU215571 | EU215601 |
| *Rhacophorus omeimontis* | EF564493 | NC 046387 | NC 046387 | EU924612 | KP895687 | NC 046387 | EU924528 | EU215565 | KU840753 |
| *Scutiger chintingensis* | EF397270 | EF397270 | KY310878 | KY310930 |  | KY310991 | KY311043 |  |  |
| *Scutiger glandulatus* | EF397276 | EF397271 | KY310883 | KY310935 |  | KY310995 | KY311049 |  |  |

Fig. S1 Phylogenetic tree of the 64 anuran species based on the three nuclear genes (RAG1, RHOD, TYR) and the six mitochondrial genes (CYTB, ND2, ND4, 12S, 16S, RAG1) using TreeAnnotator v.1.8.3 in the comparative analysis.


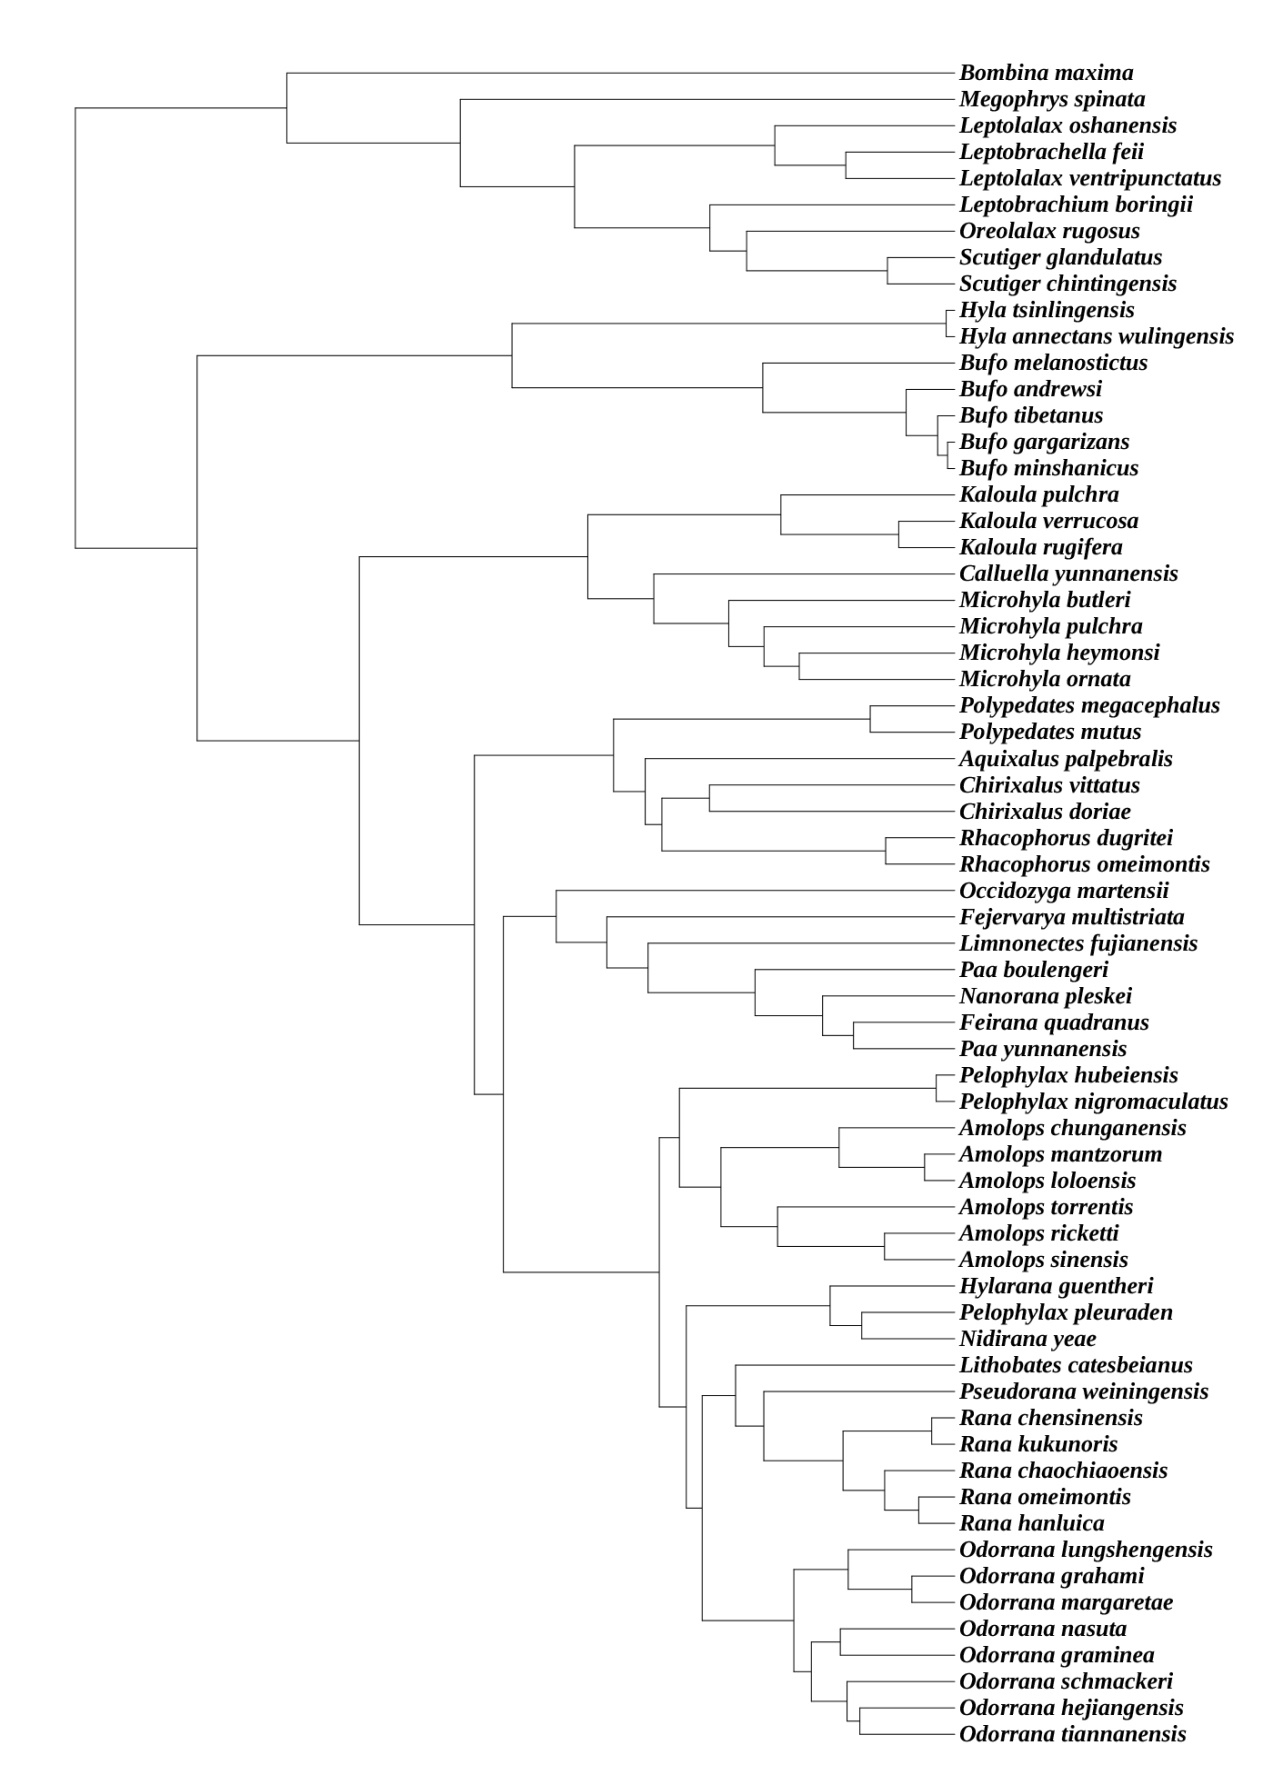

Supplement: Supplementary file 1 [file 35501624]
